# Supplementary material
Source: ML conference proceedings conference paper supplement (https://aclanthology.org/D19-5502)
Supplement: Attachment [file D19-5502.Attachment.zip]

Archive with 7 entries (7 files):
- acl_natbib.bst
- emnlp-ijcnlp-2019.bib
- emnlp-ijcnlp-2019.sty
- emnlp-ijcnlp-2019.tex
- full_pipeline.png
- emnlp-ijcnlp-2019.pdf
- full_pipeline4.png
