# Supplementary material
Source: ML conference proceedings conference paper supplement (https://aclanthology.org/D19-5502)
Supplement: Attachment [file D19-5502.Attachment.zip › emnlp-ijcnlp-2019.bib]

@article{DBLP:journals/corr/abs-1803-06535,
  author    = {Sudha Rao and
               Joel R. Tetreault},
  title     = {Dear Sir or Madam, May {I} introduce the {YAFC} Corpus: Corpus, Benchmarks
               and Metrics for Formality Style Transfer},
  journal   = {CoRR},
  volume    = {abs/1803.06535},
  year      = {2018},
  url       = {http://arxiv.org/abs/1803.06535},
  archivePrefix = {arXiv},
  eprint    = {1803.06535},
  timestamp = {Mon, 13 Aug 2018 16:47:36 +0200},
  biburl    = {https://dblp.org/rec/bib/journals/corr/abs-1803-06535},
  bibsource = {dblp computer science bibliography, https://dblp.org}
}

@article{DBLP:journals/corr/abs-1804-06437,
  author    = {Juncen Li and
               Robin Jia and
               He He and
               Percy Liang},
  title     = {Delete, Retrieve, Generate: {A} Simple Approach to Sentiment and Style
               Transfer},
  journal   = {CoRR},
  volume    = {abs/1804.06437},
  year      = {2018},
  url       = {http://arxiv.org/abs/1804.06437},
  archivePrefix = {arXiv},
  eprint    = {1804.06437},
  timestamp = {Mon, 13 Aug 2018 16:48:29 +0200},
  biburl    = {https://dblp.org/rec/bib/journals/corr/abs-1804-06437},
  bibsource = {dblp computer science bibliography, https://dblp.org}
}

@article{DBLP:journals/corr/abs-1804-09000,
  author    = {Shrimai Prabhumoye and
               Yulia Tsvetkov and
               Ruslan Salakhutdinov and
               Alan W. Black},
  title     = {Style Transfer Through Back-Translation},
  journal   = {CoRR},
  volume    = {abs/1804.09000},
  year      = {2018},
  url       = {http://arxiv.org/abs/1804.09000},
  archivePrefix = {arXiv},
  eprint    = {1804.09000},
  timestamp = {Mon, 13 Aug 2018 16:48:22 +0200},
  biburl    = {https://dblp.org/rec/bib/journals/corr/abs-1804-09000},
  bibsource = {dblp computer science bibliography, https://dblp.org}
}

@misc{SSC,
  title = {{Slate Star Codex online forum}},
  howpublished = {\url{https://slatestarcodex.com/}}
}

@book{bird2009natural,
  title={Natural language processing with Python: analyzing text with the natural language toolkit},
  author={Bird, Steven and Klein, Ewan and Loper, Edward},
  year={2009},
  publisher={" O'Reilly Media, Inc."}
}

@article{willett2006porter,
  title={The Porter stemming algorithm: then and now},
  author={Willett, Peter},
  journal={Program},
  volume={40},
  number={3},
  pages={219--223},
  year={2006},
  publisher={Emerald Group Publishing Limited}
}

@article{klein2017opennmt,
  title={Opennmt: Open-source toolkit for neural machine translation},
  author={Klein, Guillaume and Kim, Yoon and Deng, Yuntian and Senellart, Jean and Rush, Alexander M},
  journal={arXiv preprint arXiv:1701.02810},
  year={2017}
}

@article{hughes2012quantitative,
  title={Quantitative patterns of stylistic influence in the evolution of literature},
  author={Hughes, James M and Foti, Nicholas J and Krakauer, David C and Rockmore, Daniel N},
  journal={Proceedings of the National Academy of Sciences},
  volume={109},
  number={20},
  pages={7682--7686},
  year={2012},
  publisher={National Acad Sciences}
}

@article{xu2012paraphrasing,
  title={Paraphrasing for style},
  author={Xu, Wei and Ritter, Alan and Dolan, Bill and Grishman, Ralph and Cherry, Colin},
  journal={Proceedings of COLING 2012},
  pages={2899--2914},
  year={2012}
}

@article{jhamtani2017shakespearizing,
  title={Shakespearizing modern language using copy-enriched sequence-to-sequence models},
  author={Jhamtani, Harsh and Gangal, Varun and Hovy, Eduard and Nyberg, Eric},
  journal={arXiv preprint arXiv:1707.01161},
  year={2017}
}

@article{carlson2017zero,
  title={Zero-shot style transfer in text using recurrent neural networks},
  author={Carlson, Keith and Riddell, Allen and Rockmore, Daniel},
  journal={arXiv preprint arXiv:1711.04731},
  year={2017}
}

@inproceedings{xu2017shakespeare,
  title={From Shakespeare to Twitter: What are Language Styles all about?},
  author={Xu, Wei},
  booktitle={Proceedings of the Workshop on Stylistic Variation},
  pages={1--9},
  year={2017}
}

@article{tikhonov2018wrong,
  title={What is wrong with style transfer for texts?},
  author={Tikhonov, Alexey and Yamshchikov, Ivan P},
  journal={arXiv preprint arXiv:1808.04365},
  year={2018}
}
%%%%%
@article{artetxe2017unsupervised,
  title={Unsupervised neural machine translation},
  author={Artetxe, Mikel and Labaka, Gorka and Agirre, Eneko and Cho, Kyunghyun},
  journal={arXiv preprint arXiv:1710.11041},
  year={2017}
}

@inproceedings{han2017unsupervised,
  title={Unsupervised automatic text style transfer using lstm},
  author={Han, Mengqiao and Wu, Ou and Niu, Zhendong},
  booktitle={National CCF Conference on Natural Language Processing and Chinese Computing},
  pages={281--292},
  year={2017},
  organization={Springer}
}

@inproceedings{shen2017style,
  title={Style transfer from non-parallel text by cross-alignment},
  author={Shen, Tianxiao and Lei, Tao and Barzilay, Regina and Jaakkola, Tommi},
  booktitle={Advances in neural information processing systems},
  pages={6830--6841},
  year={2017}
}

@article{zhang2018shaped,
  title={Shaped: Shared-private encoder-decoder for text style adaptation},
  author={Zhang, Ye and Ding, Nan and Soricut, Radu},
  journal={arXiv preprint arXiv:1804.04093},
  year={2018}
}

@inproceedings{fu2018style,
  title={Style transfer in text: Exploration and evaluation},
  author={Fu, Zhenxin and Tan, Xiaoye and Peng, Nanyun and Zhao, Dongyan and Yan, Rui},
  booktitle={Thirty-Second AAAI Conference on Artificial Intelligence},
  year={2018}
}

@inproceedings{yang2018unsupervised,
  title={Unsupervised text style transfer using language models as discriminators},
  author={Yang, Zichao and Hu, Zhiting and Dyer, Chris and Xing, Eric P and Berg-Kirkpatrick, Taylor},
  booktitle={Advances in Neural Information Processing Systems},
  pages={7287--7298},
  year={2018}
}

@article{merity2017regularizing,
  title={Regularizing and optimizing LSTM language models},
  author={Merity, Stephen and Keskar, Nitish Shirish and Socher, Richard},
  journal={arXiv preprint arXiv:1708.02182},
  year={2017}
}

@misc{Friends,
  title = {{Friends dataset}},
  howpublished = {\url{https://github.com/npow/friends-chatbot/tree/master/data}}
}

@misc{IMSDB,
  title = {{IMSDB}},
  howpublished = {\url{https://www.imsdb.com/}}
}
