# Supplementary material
Source: ML conference proceedings conference paper supplement (https://aclanthology.org/D19-5502)
Supplement: Attachment [file D19-5502.Attachment.zip › emnlp-ijcnlp-2019.sty]

% This is the LaTex style file for EMNLP 2019, based off of ACL 2018/2019 and NAACL 2019.
% Addressing bibtex issues mentioned in https://github.com/acl-org/acl-pub/issues/2
% Other major modifications include
% changing the color of the line numbers to a light gray; changing font size of abstract to be 10pt; changing caption font size to be 10pt.
% -- M Mitchell and Stephanie Lukin

% 2017: modified to support DOI links in bibliography.  Now uses
% natbib package rather than defining citation commands in this file.
% Use with acl_natbib.bst bib style.  -- Dan Gildea

% This is the LaTeX style for ACL 2016. It contains Margaret Mitchell's
% line number adaptations (ported by Hai Zhao and Yannick Versley).

% It is nearly identical to the style files for ACL 2015,
% ACL 2014, EACL 2006, ACL2005, ACL 2002, ACL 2001, ACL 2000,
% EACL 95 and EACL 99. 
%
% Changes made include: adapt layout to A4 and centimeters, widen abstract

% This is the LaTeX style file for ACL 2000.  It is nearly identical to the
% style files for EACL 95 and EACL 99.  Minor changes include editing the
% instructions to reflect use of \documentclass rather than \documentstyle
% and removing the white space before the title on the first page
% -- John Chen, June 29, 2000

% This is the LaTeX style file for EACL-95.  It is identical to the
% style file for ANLP '94 except that the margins are adjusted for A4
% paper.  -- abney 13 Dec 94

% The ANLP '94 style file is a slightly modified
% version of the style used for AAAI and IJCAI, using some changes
% prepared by Fernando Pereira and others and some minor changes 
% by Paul Jacobs.

% Papers prepared using the aclsub.sty file and acl.bst bibtex style
% should be easily converted to final format using this style.  
% (1) Submission information (\wordcount, \subject, and \makeidpage)
% should be removed.
% (2) \summary should be removed.  The summary material should come
% after \maketitle and should be in the ``abstract'' environment
% (between \begin{abstract} and \end{abstract}).
% (3) Check all citations.  This style should handle citations correctly
% and also allows multiple citations separated by semicolons.
% (4) Check figures and examples.  Because the final format is double-
% column, some adjustments may have to be made to fit text in the column
% or to choose full-width (\figure*} figures.

% Place this in a file called aclap.sty in the TeX search path.  
% (Placing it in the same directory as the paper should also work.)

% Prepared by Peter F. Patel-Schneider, liberally using the ideas of
% other style hackers, including Barbara Beeton.
% This style is NOT guaranteed to work.  It is provided in the hope
% that it will make the preparation of papers easier.
%
% There are undoubtably bugs in this style.  If you make bug fixes,
% improvements, etc.  please let me know.  My e-mail address is:
%       pfps@research.att.com

% Papers are to be prepared using the ``acl_natbib'' bibliography style,
% as follows:
%       \documentclass[11pt]{article}
%       \usepackage{acl2000}
%       \title{Title}
%       \author{Author 1 \and Author 2 \\ Address line \\ Address line \And
%               Author 3 \\ Address line \\ Address line}
%       \begin{document}
%       ...
%       \bibliography{bibliography-file}
%       \bibliographystyle{acl_natbib}
%       \end{document}

% Author information can be set in various styles:
% For several authors from the same institution:
% \author{Author 1 \and ... \and Author n \\
%         Address line \\ ... \\ Address line}
% if the names do not fit well on one line use
%         Author 1 \\ {\bf Author 2} \\ ... \\ {\bf Author n} \\
% For authors from different institutions:
% \author{Author 1 \\ Address line \\  ... \\ Address line
%         \And  ... \And
%         Author n \\ Address line \\ ... \\ Address line}
% To start a seperate ``row'' of authors use \AND, as in
% \author{Author 1 \\ Address line \\  ... \\ Address line
%         \AND
%         Author 2 \\ Address line \\ ... \\ Address line \And
%         Author 3 \\ Address line \\ ... \\ Address line}

% If the title and author information does not fit in the area allocated,
% place \setlength\titlebox{<new height>} right after
% \usepackage{acl2015}
% where <new height> can be something larger than 5cm

% include hyperref, unless user specifies nohyperref option like this:
% \usepackage[nohyperref]{naaclhlt2018}
\newif\ifacl@hyperref
\DeclareOption{hyperref}{\acl@hyperreftrue}
\DeclareOption{nohyperref}{\acl@hyperreffalse}
\ExecuteOptions{hyperref} % default is to use hyperref
\ProcessOptions\relax
\ifacl@hyperref
  \RequirePackage{hyperref}
  \usepackage{xcolor}		% make links dark blue
  \definecolor{darkblue}{rgb}{0, 0, 0.5}
  \hypersetup{colorlinks=true,citecolor=darkblue, linkcolor=darkblue, urlcolor=darkblue}
\else
  % This definition is used if the hyperref package is not loaded.
  % It provides a backup, no-op definiton of \href.
  % This is necessary because \href command is used in the acl_natbib.bst file.
  \def\href#1#2{{#2}}
  % We still need to load xcolor in this case because the lighter line numbers require it. (SC/KG/WL) 
  \usepackage{xcolor}
\fi

\typeout{Conference Style for EMNLP 2019}

% NOTE:  Some laser printers have a serious problem printing TeX output.
% These printing devices, commonly known as ``write-white'' laser
% printers, tend to make characters too light.  To get around this
% problem, a darker set of fonts must be created for these devices.
%

\newcommand{\Thanks}[1]{\thanks{\ #1}}

% A4 modified by Eneko; again modified by Alexander for 5cm titlebox
\setlength{\paperwidth}{21cm}   % A4
\setlength{\paperheight}{29.7cm}% A4
\setlength\topmargin{-0.5cm}    
\setlength\oddsidemargin{0cm}   
\setlength\textheight{24.7cm} 
\setlength\textwidth{16.0cm}
\setlength\columnsep{0.6cm}  
\newlength\titlebox 
\setlength\titlebox{5cm}
\setlength\headheight{5pt}   
\setlength\headsep{0pt}
\thispagestyle{empty}        
\pagestyle{empty}


\flushbottom \twocolumn \sloppy

% We're never going to need a table of contents, so just flush it to
% save space --- suggested by drstrip@sandia-2
\def\addcontentsline#1#2#3{}

\newif\ifaclfinal
\aclfinalfalse
\def\aclfinalcopy{\global\aclfinaltrue}

%% ----- Set up hooks to repeat content on every page of the output doc, 
%% necessary for the line numbers in the submitted version.  --MM
%%
%% Copied from CVPR 2015's cvpr_eso.sty, which appears to be largely copied from everyshi.sty.
%%
%% Original cvpr_eso.sty available at: http://www.pamitc.org/cvpr15/author_guidelines.php
%% Original evershi.sty available at: https://www.ctan.org/pkg/everyshi
%%
%% Copyright (C) 2001 Martin Schr\"oder:
%% 
%%                         Martin Schr"oder
%%                         Cr"usemannallee 3
%%                         D-28213 Bremen
%%                         Martin.Schroeder@ACM.org
%% 
%% This program may be redistributed and/or modified under the terms
%% of the LaTeX Project Public License, either version 1.0 of this
%% license, or (at your option) any later version.
%% The latest version of this license is in
%%    CTAN:macros/latex/base/lppl.txt.
%% 
%% Happy users are requested to send [Martin] a postcard. :-)
%%
\newcommand{\@EveryShipoutACL@Hook}{}
\newcommand{\@EveryShipoutACL@AtNextHook}{}
\newcommand*{\EveryShipoutACL}[1]
   {\g@addto@macro\@EveryShipoutACL@Hook{#1}}
\newcommand*{\AtNextShipoutACL@}[1]
   {\g@addto@macro\@EveryShipoutACL@AtNextHook{#1}}
\newcommand{\@EveryShipoutACL@Shipout}{%
   \afterassignment\@EveryShipoutACL@Test
   \global\setbox\@cclv= %
   }
\newcommand{\@EveryShipoutACL@Test}{%
   \ifvoid\@cclv\relax
      \aftergroup\@EveryShipoutACL@Output
   \else
      \@EveryShipoutACL@Output
   \fi%
   }
\newcommand{\@EveryShipoutACL@Output}{%
   \@EveryShipoutACL@Hook%
   \@EveryShipoutACL@AtNextHook%
      \gdef\@EveryShipoutACL@AtNextHook{}%
   \@EveryShipoutACL@Org@Shipout\box\@cclv%
   }
\newcommand{\@EveryShipoutACL@Org@Shipout}{}
\newcommand*{\@EveryShipoutACL@Init}{%
   \message{ABD: EveryShipout initializing macros}%
   \let\@EveryShipoutACL@Org@Shipout\shipout
   \let\shipout\@EveryShipoutACL@Shipout
   }
\AtBeginDocument{\@EveryShipoutACL@Init}

%% ----- Set up for placing additional items into the submitted version --MM
%%
%% Based on eso-pic.sty
%%
%% Original available at: https://www.ctan.org/tex-archive/macros/latex/contrib/eso-pic
%% Copyright (C) 1998-2002 by Rolf Niepraschk <niepraschk@ptb.de>
%% 
%% Which may be distributed and/or modified under the conditions of
%% the LaTeX Project Public License, either version 1.2 of this license
%% or (at your option) any later version.  The latest version of this
%% license is in:
%% 
%%    http://www.latex-project.org/lppl.txt
%% 
%% and version 1.2 or later is part of all distributions of LaTeX version
%% 1999/12/01 or later.
%%
%% In contrast to the original, we do not include the definitions for/using:
%% gridpicture, div[2], isMEMOIR[1], gridSetup[6][], subgridstyle{dotted}, labelfactor{}, gap{}, gridunitname{}, gridunit{}, gridlines{\thinlines}, subgridlines{\thinlines}, the {keyval} package, evenside margin, nor any definitions with 'color'.
%%
%% These are beyond  what is needed for the NAACL/ACL style.
%%
\newcommand\LenToUnit[1]{#1\@gobble}
\newcommand\AtPageUpperLeft[1]{%
  \begingroup
    \@tempdima=0pt\relax\@tempdimb=\ESO@yoffsetI\relax
    \put(\LenToUnit{\@tempdima},\LenToUnit{\@tempdimb}){#1}%
  \endgroup
}
\newcommand\AtPageLowerLeft[1]{\AtPageUpperLeft{%
  \put(0,\LenToUnit{-\paperheight}){#1}}}
\newcommand\AtPageCenter[1]{\AtPageUpperLeft{%
  \put(\LenToUnit{.5\paperwidth},\LenToUnit{-.5\paperheight}){#1}}}
\newcommand\AtPageLowerCenter[1]{\AtPageUpperLeft{%
  \put(\LenToUnit{.5\paperwidth},\LenToUnit{-\paperheight}){#1}}}%
\newcommand\AtPageLowishCenter[1]{\AtPageUpperLeft{%
  \put(\LenToUnit{.5\paperwidth},\LenToUnit{-.96\paperheight}){#1}}}
\newcommand\AtTextUpperLeft[1]{%
  \begingroup
    \setlength\@tempdima{1in}%
    \advance\@tempdima\oddsidemargin%
    \@tempdimb=\ESO@yoffsetI\relax\advance\@tempdimb-1in\relax%
    \advance\@tempdimb-\topmargin%
    \advance\@tempdimb-\headheight\advance\@tempdimb-\headsep%
    \put(\LenToUnit{\@tempdima},\LenToUnit{\@tempdimb}){#1}%
  \endgroup
}
\newcommand\AtTextLowerLeft[1]{\AtTextUpperLeft{%
  \put(0,\LenToUnit{-\textheight}){#1}}}
\newcommand\AtTextCenter[1]{\AtTextUpperLeft{%
  \put(\LenToUnit{.5\textwidth},\LenToUnit{-.5\textheight}){#1}}}
\newcommand{\ESO@HookI}{} \newcommand{\ESO@HookII}{}
\newcommand{\ESO@HookIII}{}
\newcommand{\AddToShipoutPicture}{%
  \@ifstar{\g@addto@macro\ESO@HookII}{\g@addto@macro\ESO@HookI}}
\newcommand{\ClearShipoutPicture}{\global\let\ESO@HookI\@empty}
\newcommand{\@ShipoutPicture}{%
  \bgroup
    \@tempswafalse%
    \ifx\ESO@HookI\@empty\else\@tempswatrue\fi%
    \ifx\ESO@HookII\@empty\else\@tempswatrue\fi%
    \ifx\ESO@HookIII\@empty\else\@tempswatrue\fi%
    \if@tempswa%
      \@tempdima=1in\@tempdimb=-\@tempdima%
      \advance\@tempdimb\ESO@yoffsetI%
      \unitlength=1pt%
      \global\setbox\@cclv\vbox{%
        \vbox{\let\protect\relax
          \pictur@(0,0)(\strip@pt\@tempdima,\strip@pt\@tempdimb)%
            \ESO@HookIII\ESO@HookI\ESO@HookII%
            \global\let\ESO@HookII\@empty%
          \endpicture}%
          \nointerlineskip%
        \box\@cclv}%
    \fi
  \egroup
}
\EveryShipoutACL{\@ShipoutPicture}
\newif\ifESO@dvips\ESO@dvipsfalse 
\newif\ifESO@grid\ESO@gridfalse
\newif\ifESO@texcoord\ESO@texcoordfalse
\newcommand*\ESO@griddelta{}\newcommand*\ESO@griddeltaY{}
\newcommand*\ESO@gridDelta{}\newcommand*\ESO@gridDeltaY{}
\newcommand*\ESO@yoffsetI{}\newcommand*\ESO@yoffsetII{}
\ifESO@texcoord
  \def\ESO@yoffsetI{0pt}\def\ESO@yoffsetII{-\paperheight}
  \edef\ESO@griddeltaY{-\ESO@griddelta}\edef\ESO@gridDeltaY{-\ESO@gridDelta}
\else
  \def\ESO@yoffsetI{\paperheight}\def\ESO@yoffsetII{0pt}
  \edef\ESO@griddeltaY{\ESO@griddelta}\edef\ESO@gridDeltaY{\ESO@gridDelta}
\fi


%% ----- Submitted version markup: Page numbers, ruler, and confidentiality.  Using ideas/code from cvpr.sty 2015. --MM

\font\aclhv  = phvb at 8pt 

%% Define vruler %%

%\makeatletter
\newbox\aclrulerbox
\newcount\aclrulercount
\newdimen\aclruleroffset
\newdimen\cv@lineheight
\newdimen\cv@boxheight
\newbox\cv@tmpbox
\newcount\cv@refno
\newcount\cv@tot
% NUMBER with left flushed zeros  \fillzeros[<WIDTH>]<NUMBER>
\newcount\cv@tmpc@ \newcount\cv@tmpc
\def\fillzeros[#1]#2{\cv@tmpc@=#2\relax\ifnum\cv@tmpc@<0\cv@tmpc@=-\cv@tmpc@\fi
\cv@tmpc=1 %
\loop\ifnum\cv@tmpc@<10 \else \divide\cv@tmpc@ by 10 \advance\cv@tmpc by 1 \fi
   \ifnum\cv@tmpc@=10\relax\cv@tmpc@=11\relax\fi \ifnum\cv@tmpc@>10 \repeat
\ifnum#2<0\advance\cv@tmpc1\relax-\fi
\loop\ifnum\cv@tmpc<#1\relax0\advance\cv@tmpc1\relax\fi \ifnum\cv@tmpc<#1 \repeat
\cv@tmpc@=#2\relax\ifnum\cv@tmpc@<0\cv@tmpc@=-\cv@tmpc@\fi \relax\the\cv@tmpc@}%
% \makevruler[<SCALE>][<INITIAL_COUNT>][<STEP>][<DIGITS>][<HEIGHT>]
\def\makevruler[#1][#2][#3][#4][#5]{\begingroup\offinterlineskip
\textheight=#5\vbadness=10000\vfuzz=120ex\overfullrule=0pt%
\global\setbox\aclrulerbox=\vbox to \textheight{%
{\parskip=0pt\hfuzz=150em\cv@boxheight=\textheight
\color{gray}
\cv@lineheight=#1\global\aclrulercount=#2%
\cv@tot\cv@boxheight\divide\cv@tot\cv@lineheight\advance\cv@tot2%
\cv@refno1\vskip-\cv@lineheight\vskip1ex%
\loop\setbox\cv@tmpbox=\hbox to0cm{{\aclhv\hfil\fillzeros[#4]\aclrulercount}}%
\ht\cv@tmpbox\cv@lineheight\dp\cv@tmpbox0pt\box\cv@tmpbox\break
\advance\cv@refno1\global\advance\aclrulercount#3\relax
\ifnum\cv@refno<\cv@tot\repeat}}\endgroup}%
%\makeatother


\def\aclpaperid{***}
\def\confidential{\textcolor{black}{Confidential Review Copy.  DO NOT DISTRIBUTE.}}

%% Page numbering, Vruler and Confidentiality %%
% \makevruler[<SCALE>][<INITIAL_COUNT>][<STEP>][<DIGITS>][<HEIGHT>]

% SC/KG/WL - changed line numbering to gainsboro
\definecolor{gainsboro}{rgb}{0.8, 0.8, 0.8}
%\def\aclruler#1{\makevruler[14.17pt][#1][1][3][\textheight]\usebox{\aclrulerbox}}  %% old line
\def\aclruler#1{\textcolor{gainsboro}{\makevruler[14.17pt][#1][1][3][\textheight]\usebox{\aclrulerbox}}}

\def\leftoffset{-2.1cm} %original: -45pt
\def\rightoffset{17.5cm} %original: 500pt
\ifaclfinal\else\pagenumbering{arabic}
\AddToShipoutPicture{%
\ifaclfinal\else
\AtPageLowishCenter{\textcolor{black}{\thepage}}
\aclruleroffset=\textheight
\advance\aclruleroffset4pt
  \AtTextUpperLeft{% 
    \put(\LenToUnit{\leftoffset},\LenToUnit{-\aclruleroffset}){%left ruler
      \aclruler{\aclrulercount}}
    \put(\LenToUnit{\rightoffset},\LenToUnit{-\aclruleroffset}){%right ruler
      \aclruler{\aclrulercount}}
  }
  \AtTextUpperLeft{%confidential
    \put(0,\LenToUnit{1cm}){\parbox{\textwidth}{\centering\aclhv\confidential}}
  }
\fi
}

%%%% ----- End settings for placing additional items into the submitted version --MM ----- %%%%

%%%% ----- Begin settings for both submitted and camera-ready version ----- %%%%

%% Title and Authors %%

\newcommand\outauthor{
    \begin{tabular}[t]{c}
	\ifaclfinal 
	     \bf\@author
	\else 
		% Avoiding common accidental de-anonymization issue. --MM
        \bf Anonymous EMNLP:W-NUT submission
	\fi
    \end{tabular}}

% Changing the expanded titlebox for submissions to 2.5 in (rather than 6.5cm)
% and moving it to the style sheet, rather than within the example tex file. --MM
\ifaclfinal 
\else 
	\addtolength\titlebox{.25in}
\fi
% Mostly taken from deproc.
\def\maketitle{\par
 \begingroup
   \def\thefootnote{\fnsymbol{footnote}}
   \def\@makefnmark{\hbox to 0pt{$^{\@thefnmark}$\hss}}
   \twocolumn[\@maketitle] \@thanks
 \endgroup
 \setcounter{footnote}{0}
 \let\maketitle\relax \let\@maketitle\relax
 \gdef\@thanks{}\gdef\@author{}\gdef\@title{}\let\thanks\relax}
\def\@maketitle{\vbox to \titlebox{\hsize\textwidth
 \linewidth\hsize \vskip 0.125in minus 0.125in \centering
 {\Large\bf \@title \par} \vskip 0.2in plus 1fil minus 0.1in
 {\def\and{\unskip\enspace{\rm and}\enspace}%
  \def\And{\end{tabular}\hss \egroup \hskip 1in plus 2fil 
           \hbox to 0pt\bgroup\hss \begin{tabular}[t]{c}\bf}%
  \def\AND{\end{tabular}\hss\egroup \hfil\hfil\egroup
          \vskip 0.25in plus 1fil minus 0.125in
           \hbox to \linewidth\bgroup\large \hfil\hfil
             \hbox to 0pt\bgroup\hss \begin{tabular}[t]{c}\bf}
  \hbox to \linewidth\bgroup\large \hfil\hfil
    \hbox to 0pt\bgroup\hss 
	\outauthor
   \hss\egroup
    \hfil\hfil\egroup}
  \vskip 0.3in plus 2fil minus 0.1in
}}

% margins and font size for abstract
\renewenvironment{abstract}%
		 {\centerline{\large\bf Abstract}%
		  \begin{list}{}%
		     {\setlength{\rightmargin}{0.6cm}%
		      \setlength{\leftmargin}{0.6cm}}%
		   \item[]\ignorespaces%
		   \@setsize\normalsize{12pt}\xpt\@xpt
		   }%
		 {\unskip\end{list}}
  
%\renewenvironment{abstract}{\centerline{\large\bf  
% Abstract}\vspace{0.5ex}\begin{quote}}{\par\end{quote}\vskip 1ex}

% Resizing figure and table captions - SL
\newcommand{\figcapfont}{\rm}
\newcommand{\tabcapfont}{\rm}
\renewcommand{\fnum@figure}{\figcapfont Figure \thefigure}
\renewcommand{\fnum@table}{\tabcapfont Table \thetable}
\renewcommand{\figcapfont}{\@setsize\normalsize{12pt}\xpt\@xpt}
\renewcommand{\tabcapfont}{\@setsize\normalsize{12pt}\xpt\@xpt}	
% Support for interacting with the caption, subfigure, and subcaption packages - SL
\usepackage{caption}
\DeclareCaptionFont{10pt}{\fontsize{10pt}{12pt}\selectfont}
\captionsetup{font=10pt}

\RequirePackage{natbib}
% for citation commands in the .tex, authors can use:
% \citep, \citet, and \citeyearpar for compatibility with natbib, or
% \cite, \newcite, and \shortcite for compatibility with older ACL .sty files
\renewcommand\cite{\citep}	% to get "(Author Year)" with natbib    
\newcommand\shortcite{\citeyearpar}% to get "(Year)" with natbib    
\newcommand\newcite{\citet}	% to get "Author (Year)" with natbib    

% DK/IV: Workaround for annoying hyperref pagewrap bug 
\RequirePackage{etoolbox}
\patchcmd\@combinedblfloats{\box\@outputbox}{\unvbox\@outputbox}{}{\errmessage{\noexpand patch failed}}

% bibliography

\def\@up#1{\raise.2ex\hbox{#1}}

% Don't put a label in the bibliography at all.  Just use the unlabeled format
% instead.
\def\thebibliography#1{\vskip\parskip%
\vskip\baselineskip%
\def\baselinestretch{1}%
\ifx\@currsize\normalsize\@normalsize\else\@currsize\fi%
\vskip-\parskip%
\vskip-\baselineskip%
\section*{References\@mkboth
 {References}{References}}\list
 {}{\setlength{\labelwidth}{0pt}\setlength{\leftmargin}{\parindent}
 \setlength{\itemindent}{-\parindent}}
 \def\newblock{\hskip .11em plus .33em minus -.07em}
 \sloppy\clubpenalty4000\widowpenalty4000
 \sfcode`\.=1000\relax}
\let\endthebibliography=\endlist


% Allow for a bibliography of sources of attested examples
\def\thesourcebibliography#1{\vskip\parskip%
\vskip\baselineskip%
\def\baselinestretch{1}%
\ifx\@currsize\normalsize\@normalsize\else\@currsize\fi%
\vskip-\parskip%
\vskip-\baselineskip%
\section*{Sources of Attested Examples\@mkboth
 {Sources of Attested Examples}{Sources of Attested Examples}}\list
 {}{\setlength{\labelwidth}{0pt}\setlength{\leftmargin}{\parindent}
 \setlength{\itemindent}{-\parindent}}
 \def\newblock{\hskip .11em plus .33em minus -.07em}
 \sloppy\clubpenalty4000\widowpenalty4000
 \sfcode`\.=1000\relax}
\let\endthesourcebibliography=\endlist

% sections with less space
\def\section{\@startsection {section}{1}{\z@}{-2.0ex plus
    -0.5ex minus -.2ex}{1.5ex plus 0.3ex minus .2ex}{\large\bf\raggedright}}
\def\subsection{\@startsection{subsection}{2}{\z@}{-1.8ex plus
    -0.5ex minus -.2ex}{0.8ex plus .2ex}{\normalsize\bf\raggedright}}
%% changed by KO to - values to get teh initial parindent right
\def\subsubsection{\@startsection{subsubsection}{3}{\z@}{-1.5ex plus
   -0.5ex minus -.2ex}{0.5ex plus .2ex}{\normalsize\bf\raggedright}}
\def\paragraph{\@startsection{paragraph}{4}{\z@}{1.5ex plus
   0.5ex minus .2ex}{-1em}{\normalsize\bf}}
\def\subparagraph{\@startsection{subparagraph}{5}{\parindent}{1.5ex plus
   0.5ex minus .2ex}{-1em}{\normalsize\bf}}

% Footnotes
\footnotesep 6.65pt %
\skip\footins 9pt plus 4pt minus 2pt
\def\footnoterule{\kern-3pt \hrule width 5pc \kern 2.6pt }
\setcounter{footnote}{0}

% Lists and paragraphs
\parindent 1em
\topsep 4pt plus 1pt minus 2pt
\partopsep 1pt plus 0.5pt minus 0.5pt
\itemsep 2pt plus 1pt minus 0.5pt
\parsep 2pt plus 1pt minus 0.5pt

\leftmargin 2em \leftmargini\leftmargin \leftmarginii 2em
\leftmarginiii 1.5em \leftmarginiv 1.0em \leftmarginv .5em \leftmarginvi .5em
\labelwidth\leftmargini\advance\labelwidth-\labelsep \labelsep 5pt

\def\@listi{\leftmargin\leftmargini}
\def\@listii{\leftmargin\leftmarginii
   \labelwidth\leftmarginii\advance\labelwidth-\labelsep
   \topsep 2pt plus 1pt minus 0.5pt
   \parsep 1pt plus 0.5pt minus 0.5pt
   \itemsep \parsep}
\def\@listiii{\leftmargin\leftmarginiii
    \labelwidth\leftmarginiii\advance\labelwidth-\labelsep
    \topsep 1pt plus 0.5pt minus 0.5pt 
    \parsep \z@ \partopsep 0.5pt plus 0pt minus 0.5pt
    \itemsep \topsep}
\def\@listiv{\leftmargin\leftmarginiv
     \labelwidth\leftmarginiv\advance\labelwidth-\labelsep}
\def\@listv{\leftmargin\leftmarginv
     \labelwidth\leftmarginv\advance\labelwidth-\labelsep}
\def\@listvi{\leftmargin\leftmarginvi
     \labelwidth\leftmarginvi\advance\labelwidth-\labelsep}

\abovedisplayskip 7pt plus2pt minus5pt%
\belowdisplayskip \abovedisplayskip
\abovedisplayshortskip  0pt plus3pt%   
\belowdisplayshortskip  4pt plus3pt minus3pt%

% Less leading in most fonts (due to the narrow columns)
% The choices were between 1-pt and 1.5-pt leading
\def\@normalsize{\@setsize\normalsize{11pt}\xpt\@xpt}
\def\small{\@setsize\small{10pt}\ixpt\@ixpt}
\def\footnotesize{\@setsize\footnotesize{10pt}\ixpt\@ixpt}
\def\scriptsize{\@setsize\scriptsize{8pt}\viipt\@viipt}
\def\tiny{\@setsize\tiny{7pt}\vipt\@vipt}
\def\large{\@setsize\large{14pt}\xiipt\@xiipt}
\def\Large{\@setsize\Large{16pt}\xivpt\@xivpt}
\def\LARGE{\@setsize\LARGE{20pt}\xviipt\@xviipt}
\def\huge{\@setsize\huge{23pt}\xxpt\@xxpt}
\def\Huge{\@setsize\Huge{28pt}\xxvpt\@xxvpt}
