# Supplementary material
Source: ML conference proceedings conference paper supplement (https://aclanthology.org/D19-5502)

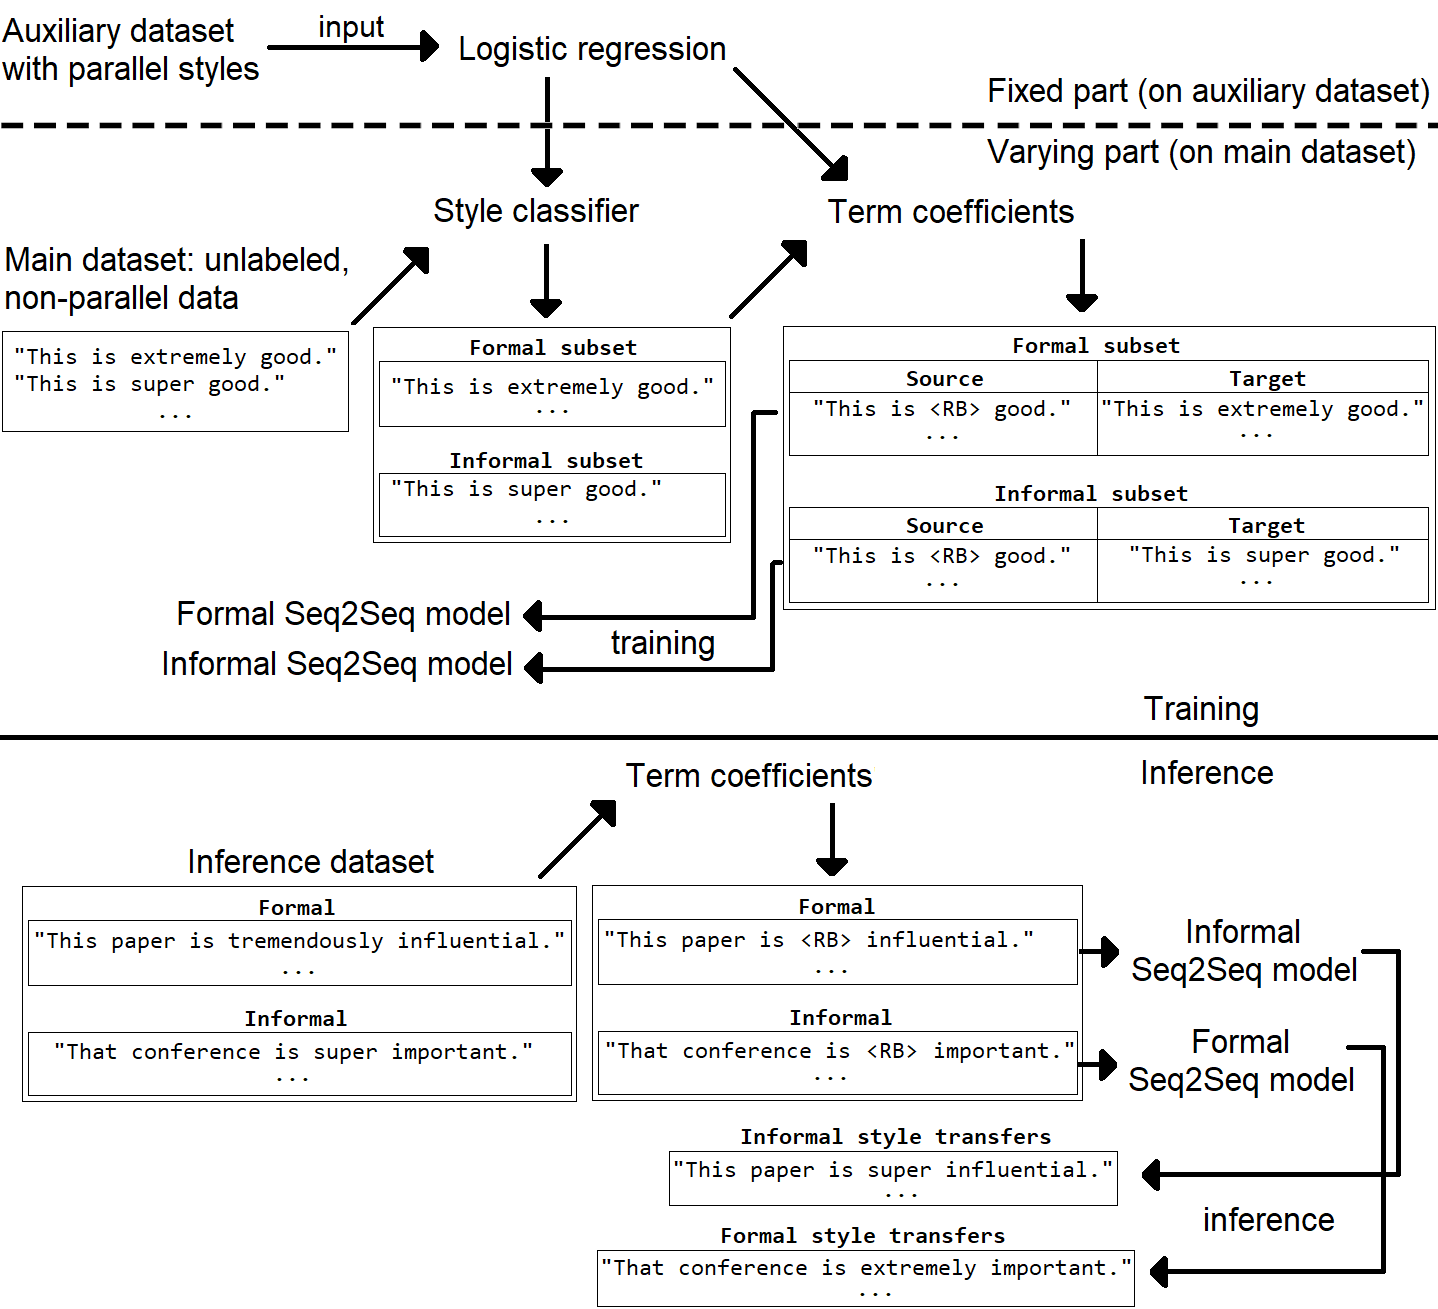

Supplement: Attachment [file D19-5502.Attachment.zip › full_pipeline.png]

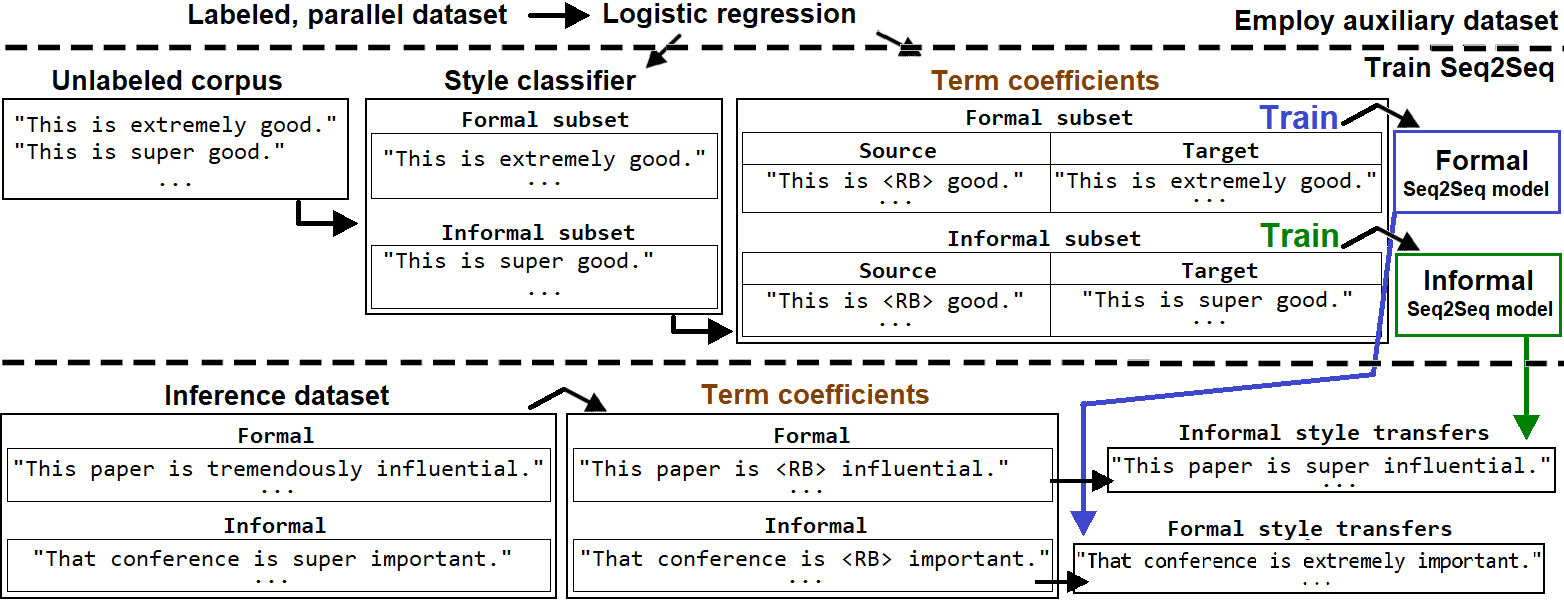

Supplement: Attachment [file D19-5502.Attachment.zip › full_pipeline4.png]
